# Supplementary material for: Effects of Combined Inorganic Nitrate and Nitrite Supplementation on Cardiorespiratory Fitness and Skeletal Muscle Oxidative Capacity in Type 2 Diabetes: A Pilot Randomized Controlled Trial
Source: MDPI journal article supplement (doi:10.3390/nu14214479), 2022-10-25
Supplement: s1 [file s1]

# Effects of Combined Inorganic Nitrate and Nitrite Supplementation on Cardiorespiratory Fitness and Skeletal Muscle Oxidative Capacity in Type 2 Diabetes: A Pilot Randomized Controlled Trial

Kristen D. Turner <sup>1</sup>, Ana Kronemberger <sup>1</sup>, Dam Bae <sup>1</sup>, Joshua M. Bock <sup>2</sup>, William E. Hughes <sup>2</sup>, Kenichi Ueda <sup>3</sup>, Andrew J. Feider <sup>3</sup>, Satoshi Hanada <sup>3</sup>, Luis G. O. de Sousa <sup>4</sup>, Matthew P. Harris <sup>1</sup>, Ethan J. Anderson <sup>5,6,7</sup>, Sue C. Bodine <sup>4,6</sup>, M. Bridget Zimmerman <sup>8</sup>, Darren P. Casey <sup>2,6,7,9</sup> and Vitor A. Lira <sup>1,6,7,9,\*</sup>

## SUPPLEMENTARY MATERIAL

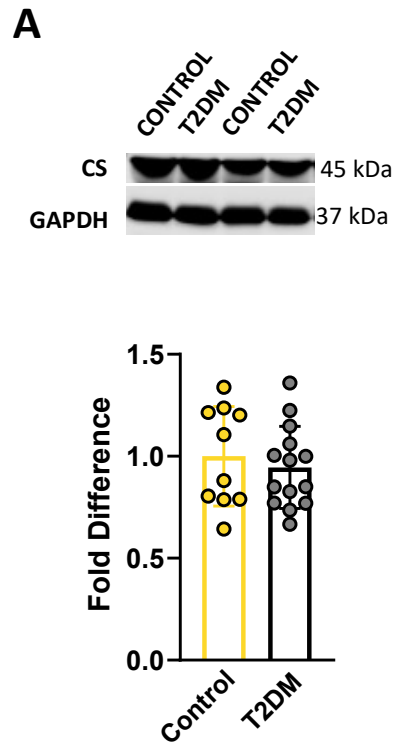

**Supplemental Figure S1.** Citrate Synthase (CS) expression in T2DM patients and non-diabetic controls. A) (Top) Representative western blots for CS protein. (Bottom) Quantification of CS protein expression in muscles from controls (N=10) and T2DM subjects (N=14). Data are presented as mean $\pm$ SD.

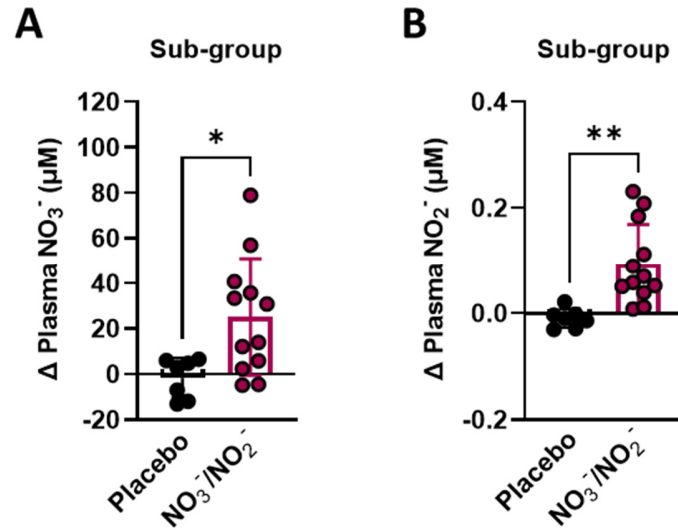

**Supplemental Figure S2.** Plasma nitrate ( $\text{NO}_3^-$ ) and nitrite ( $\text{NO}_2^-$ ) levels after combined  $\text{NO}_3^-/\text{NO}_2^-$  supplementation vs. Placebo in T2DM participants that provided muscle biopsies (Sub-group). A) ANCOVA results, using pre-supplementation values of  $\text{NO}_3^-$  as a covariate, showing individual changes (post – pre) for plasma  $\text{NO}_3^-$  from T2DM subjects (N=7 for placebo and N=12 for  $\text{NO}_3^-/\text{NO}_2^-$  group). B) ANCOVA results, using pre-supplementation values of  $\text{NO}_2^-$  as a covariate, showing individual changes (post – pre) for plasma  $\text{NO}_2^-$  as shown in A (N=7 for placebo and N=12 for  $\text{NO}_3^-/\text{NO}_2^-$  group). Data are presented as mean $\pm$ SD. \*P < 0.05; \*\*P<0.01.

**A**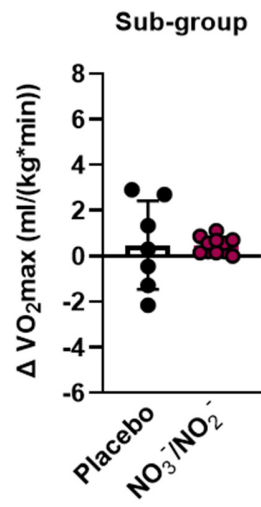**B**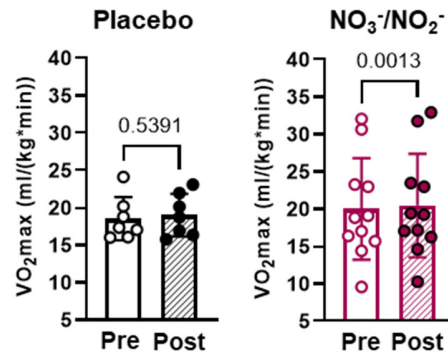**C**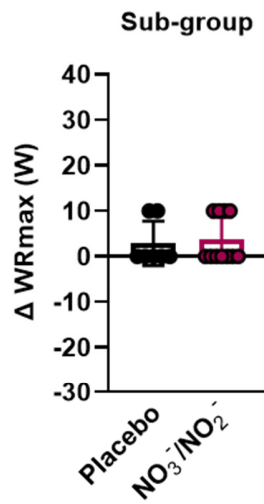**D**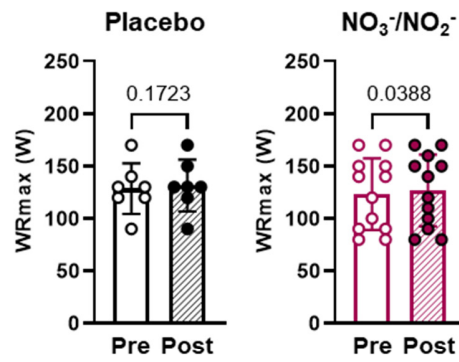**E**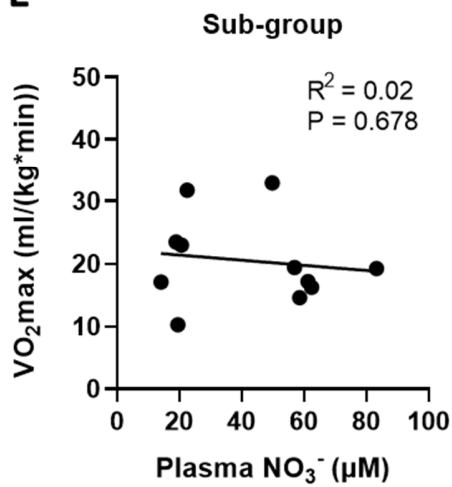**F**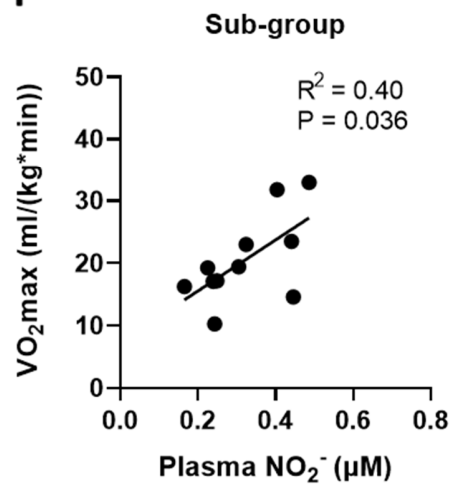

**Supplemental Figure S3.** Impact of combined nitrate/nitrite ( $\text{NO}_3^-/\text{NO}_2^-$ ) supplementation on maximal oxygen uptake capacity ( $\text{VO}_2\text{max}$ ) in T2DM participants that provided muscle biopsies (Sub-group). A) ANCOVA results, using pre-supplementation values of  $\text{VO}_2\text{max}$  as a covariate, showing individual changes (post – pre) for  $\text{VO}_2\text{max}$  from sub-groups of T2DM subjects (N=7 for placebo and N=12 for  $\text{NO}_3^-/\text{NO}_2^-$  group). B) Paired T-tests for  $\text{VO}_2\text{max}$  before and after intervention from sub-groups of T2DM subjects (N=7 for placebo and N=12 for  $\text{NO}_3^-/\text{NO}_2^-$  group). C) ANCOVA results, using pre-supplementation values of maximal work rate ( $\text{WRmax}$ ) as a covariate, showing individual changes (post – pre) for  $\text{WRmax}$  from sub-groups of T2DM subjects (N=7 for placebo and N=12 for  $\text{NO}_3^-/\text{NO}_2^-$  group). D) Paired T-tests for  $\text{WRmax}$  before and after intervention from sub-groups of T2DM subjects (N=7 for placebo and N=12 for  $\text{NO}_3^-/\text{NO}_2^-$  group). E) Relationship between plasma  $\text{NO}_3^-$  and  $\text{VO}_2\text{max}$  in the sub-group of T2DM subjects (N = 12;  $r = 0.09$ ; Slope 95% CI: -0.257, 0.175). B) Relationship between  $\text{NO}_2^-$  and  $\text{VO}_2\text{max}$  in the sub-group of T2DM subjects (N = 12;  $r = 0.64$ ; Slope 95% CI: 3.343, 78.36).

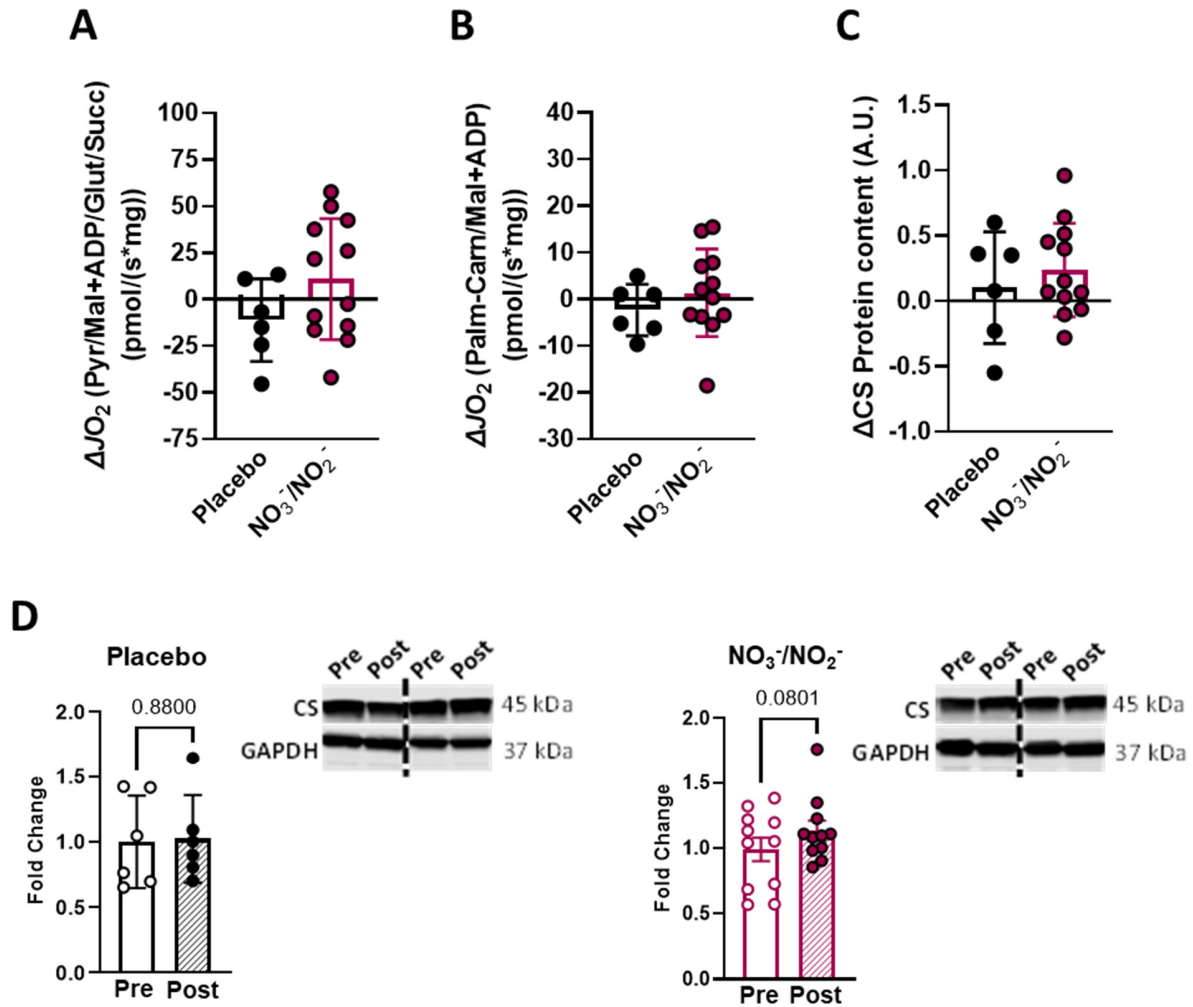

**Supplemental Figure S4.** Changes in skeletal muscle mitochondria respiratory capacity and citrate synthase expression resulting from combined  $NO_3^-/NO_2^-$  supplementation in T2DM participants. A) ANCOVA results, using pre-supplementation values of  $JO_2$  as a covariate, showing mean individual delta changes (post – pre) for  $JO_2$  under maximal CHO-supported respiration (N=7 for placebo and N=12 for  $NO_3^-/NO_2^-$  group) (P=0.16). B) ANCOVA results, using pre-supplementation values of  $JO_2$  as a covariate, showing mean individual delta changes (post – pre) for  $JO_2$  under maximal FA-supported respiration (N=7 for placebo and N=12 for  $NO_3^-/NO_2^-$  group) (P=0.39). C) ANCOVA results, using pre-supplementation values of CS as a covariate, showing mean individual delta changes (post – pre) for CS (N=6 for placebo and N=12 for  $NO_3^-/NO_2^-$  group) (P=0.49). D) Paired T-tests and representative western blots for CS before and after intervention for the Placebo group (Left, N=6) and  $NO_3^-/NO_2^-$  group (Right, N=12). Data are presented as mean $\pm$ SD.

**Supplemental Table S1.** Clinical post-supplementation characteristics of T2DM subjects that provided muscle biopsies (Sub-group).

|                          | SUB-GROUP                 |                                          |                                                                              |                                                                                             |
|--------------------------|---------------------------|------------------------------------------|------------------------------------------------------------------------------|---------------------------------------------------------------------------------------------|
|                          | T2DM<br>Placebo<br>(post) | T2DM<br>Placebo<br>(% change<br>vs. pre) | T2DM<br>NO <sub>3</sub> <sup>-</sup> /NO <sub>2</sub> <sup>-</sup><br>(post) | T2DM<br>NO <sub>3</sub> <sup>-</sup> /NO <sub>2</sub> <sup>-</sup><br>(% change<br>vs. pre) |
| N                        | 7                         | --                                       | 12                                                                           | --                                                                                          |
| Age (years)              | 60±12                     | --                                       | 58±10                                                                        | --                                                                                          |
| BMI (kg/m <sup>2</sup> ) | 32.5±6.3                  | -0.7±3.1                                 | 33.0±5.5                                                                     | 0.4±2.5                                                                                     |
| Glucose (mg/dL)          | 171±49                    | -11±23                                   | 185±65                                                                       | -4±27                                                                                       |
| Insulin (μU/mL)          | 22.2±15.7                 | -9±36                                    | 25.2±18.0                                                                    | -1±45                                                                                       |
| HbA1c (%)                | 7.5±1.7                   | -1.3±12.1                                | 7.7±1.2                                                                      | -2.0±10.5                                                                                   |

Data are presented as mean±standard deviation. No significant differences were observed across groups or in comparison to pre-supplementation values.

**Supplemental Table S2.** Baseline characteristics and delta changes with supplementation of highly responsive (in terms of skeletal muscle oxidative capacity) vs. little or not responsive T2DM subjects in the  $\text{NO}_3^-/\text{NO}_2^-$  group that provided muscle biopsies (Sub-group).

|                                                                           | $\text{NO}_3^-/\text{NO}_2^-$ supplementation<br>(mitochondrial respiration) |             |      |
|---------------------------------------------------------------------------|------------------------------------------------------------------------------|-------------|------|
|                                                                           | Highly Responsive                                                            | Others      | P    |
| N                                                                         | 5                                                                            | 7           | --   |
| Age (years)                                                               | 56.2±10.89                                                                   | 60.3±9.23   | 0.50 |
| Men, n (%)                                                                | 3 (60)                                                                       | 5 (71)      | 0.68 |
| BMI ( $\text{kg}/\text{m}^2$ )                                            | 32.7±7.88                                                                    | 32.9±2.77   | 0.97 |
| Glucose ( $\text{mg}/\text{dL}$ )                                         | 154.2±42.12                                                                  | 190.4±53.66 | 0.24 |
| Insulin ( $\mu\text{U}/\text{mL}$ )                                       | 26.5±17.54                                                                   | 19.0±11.26  | 0.39 |
| HbA1c (%)                                                                 | 7.1±1.29                                                                     | 8.4±1.40    | 0.12 |
| $\text{NO}_3^-$ ( $\mu\text{M}$ )                                         | 18.6±4.9                                                                     | 29.6±24.2   | 0.34 |
| $\Delta \text{NO}_3^-$ ( $\mu\text{M}$ )                                  | 15.3±17.5                                                                    | 32.2±29.7   | 0.29 |
| $\text{NO}_2^-$ ( $\mu\text{M}$ )                                         | 0.3±0.18                                                                     | 0.2±0.07    | 0.45 |
| $\Delta \text{NO}_2^-$ ( $\mu\text{M}$ )                                  | 0.10±0.08                                                                    | 0.09±0.08   | 0.77 |
| $\text{VO}_2\text{max}$ ( $\text{ml}/(\text{kg}\cdot\text{min})$ )        | 22.55±8.7                                                                    | 17.65±3.2   | 0.22 |
| $\Delta \text{VO}_2\text{max}$ ( $\text{ml}/(\text{kg}\cdot\text{min})$ ) | 1.21±1.13                                                                    | 0.31±0.24   | 0.09 |
| Citrate Synthase (CS) protein (A.U.)                                      | 1.27±0.28                                                                    | 1.10±0.36   | 0.41 |
| $\Delta$ CS protein (A.U.)                                                | 0.37±0.38                                                                    | 0.17±0.32   | 0.43 |
| <i>Prescription Medications, n (%)</i>                                    |                                                                              |             |      |
| Insulin                                                                   | 1 (20)                                                                       | 2 (29)      | 0.74 |
| Metformin                                                                 | 4 (80)                                                                       | 7 (100)     | 0.22 |
| Sulfonylureas                                                             | 3 (60)                                                                       | 4 (57)      | 0.92 |
| Statins                                                                   | 4 (80)                                                                       | 4 (57)      | 0.41 |
| ACE inhibitors                                                            | 1 (20)                                                                       | 2 (29)      | 0.74 |
| Angiotensin Receptor Blocker (ARB)                                        | 2 (40)                                                                       | 1 (14)      | 0.31 |
| Beta-blocker                                                              | 2 (40)                                                                       | 0 (0)       | 0.07 |

Data are presented as mean±standard deviation. A.U. – arbitrary units.



## **Supplemental Material and Methods**

### **Western Blots**

Muscle lysates were obtained as previously described [1], and citrate synthase protein was normalized to GAPDH. Antibodies used were citrate synthase (SAB2701077, Sigma; 1:2000 dilution) and GAPDH (2118, Cell Signaling; 1:2000 dilution). All analyses were carried out using Image Lab Software 6.0.1 (Bio-Rad, USA).

### **Reference:**

[1] Fuqua JD, Mere CP, Kronemberger A, Blomme J, Bae D, Turner KD, et al. ULK2 is essential for degradation of ubiquitinated protein aggregates and homeostasis in skeletal muscle. *FASEB J* 2019;33:11735–2745. <https://doi.org/10.1096/FJ.201900766R>.
